# Supplementary material for: Confinement effects on the interaction of native DNA with Cu(ii)–5-(triethylammoniummethyl)salicylidene ortho-phenylendiiminate in C12E4 liquid crystals
Source: Royal Society of Chemistry journal article supplement (doi:10.1039/b804610g), 2008-01-01
Supplement: b804610g.pdf [file b804610g.pdf]

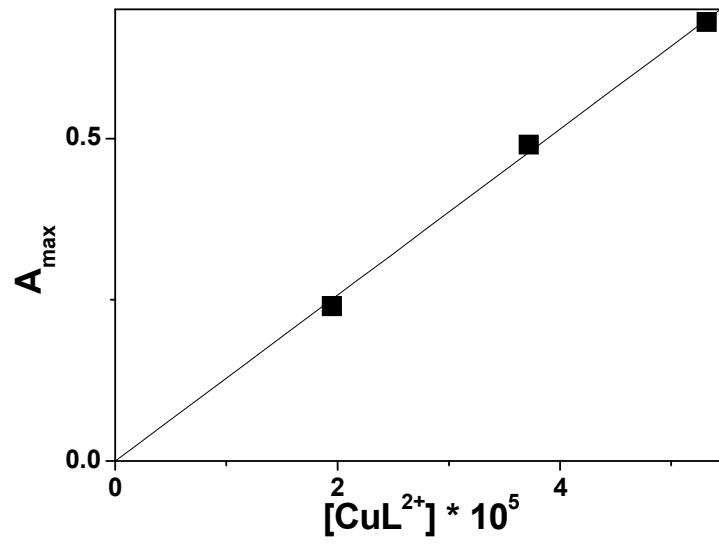

Fig. S1. Absorbance ( $A_{\text{max}}$ ) at the maximum of the band at  $\sim 400$  nm of  $\text{CuL}^{2+}$  in DNA,  $\text{CuL}^{2+}$ ,  $\text{W/C}_{12}\text{E}_4$  systems as function of complex concentration.
